# Supplementary material
Source: PubMed Central journal article supplement (PMC8108389)

Supplemental figure 1

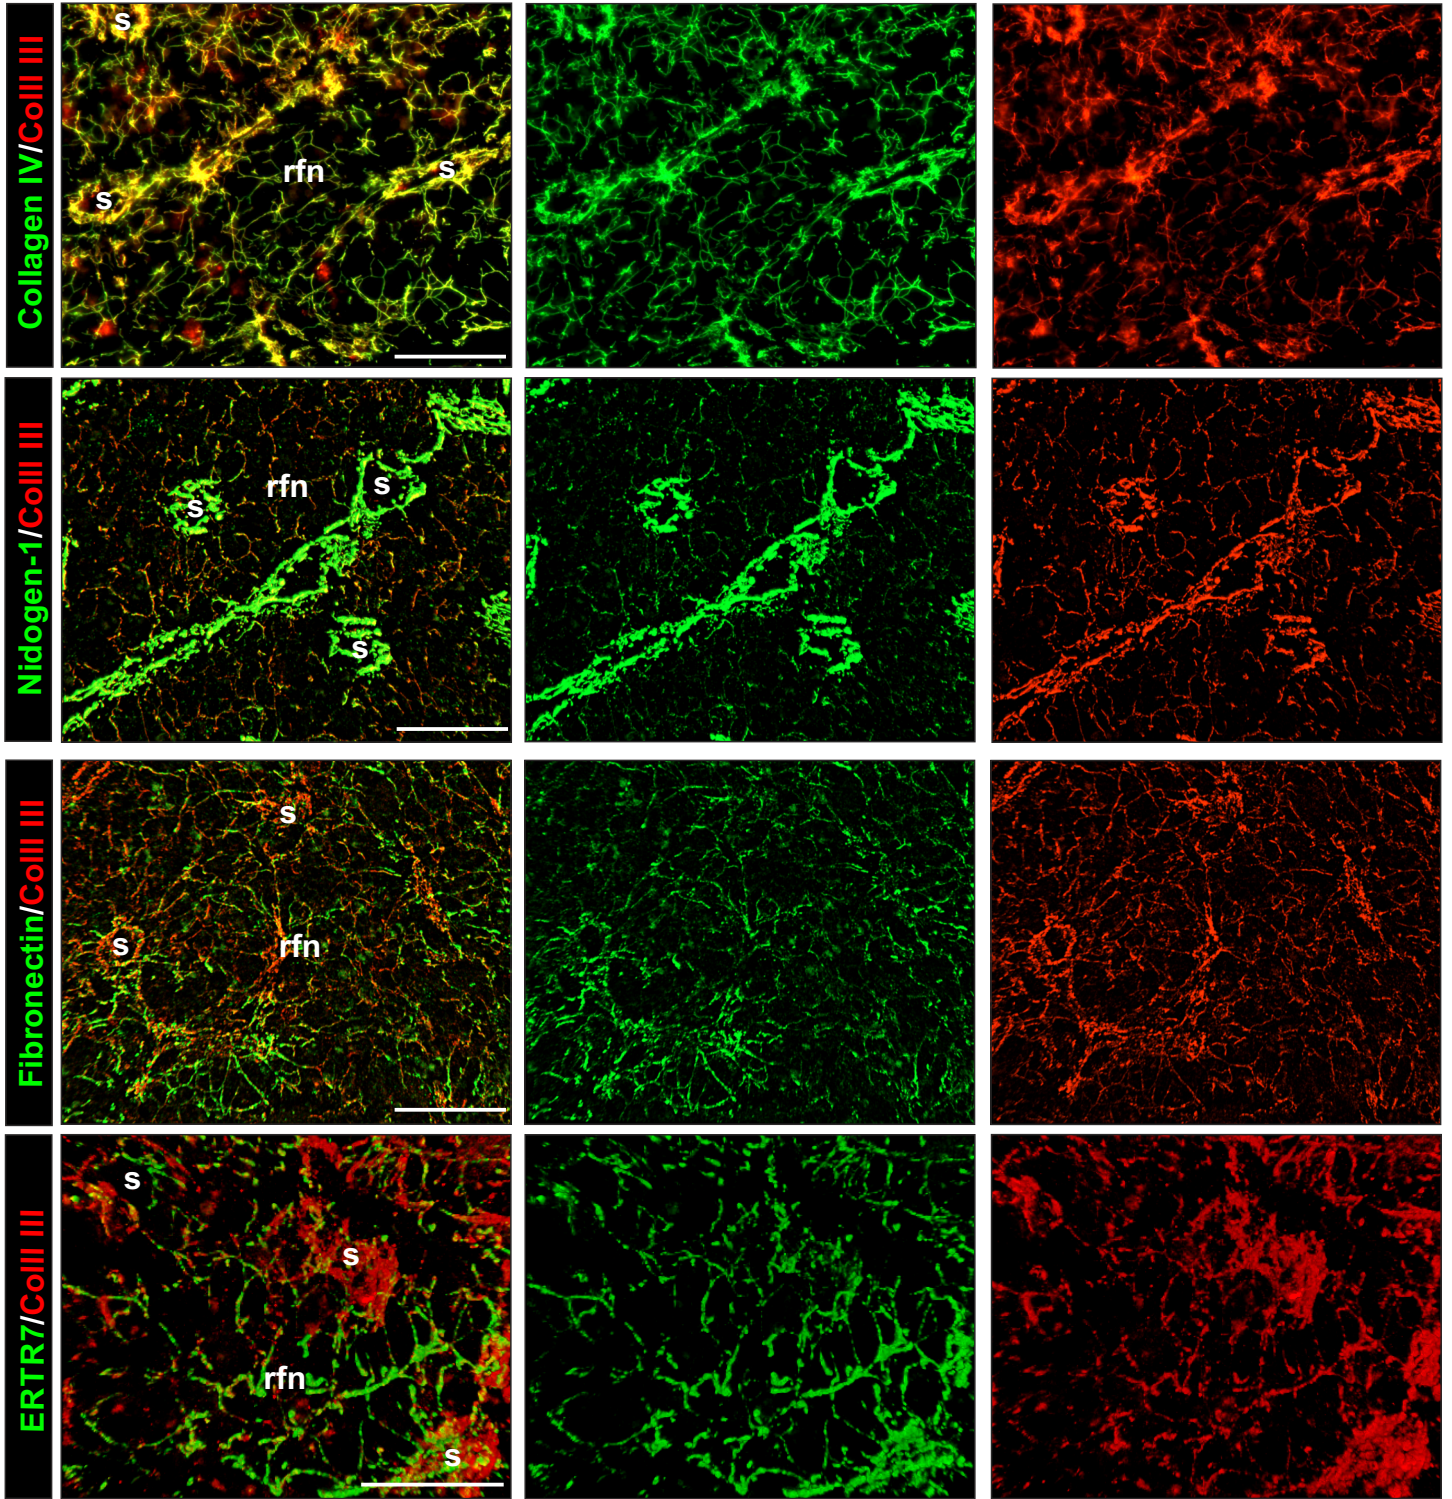

Supplement: NIHMS1692048-supplement-Supple_figure_S1.pdf [file NIHMS1692048-supplement-Supple_figure_S1.pdf]

Supplemental figure S2

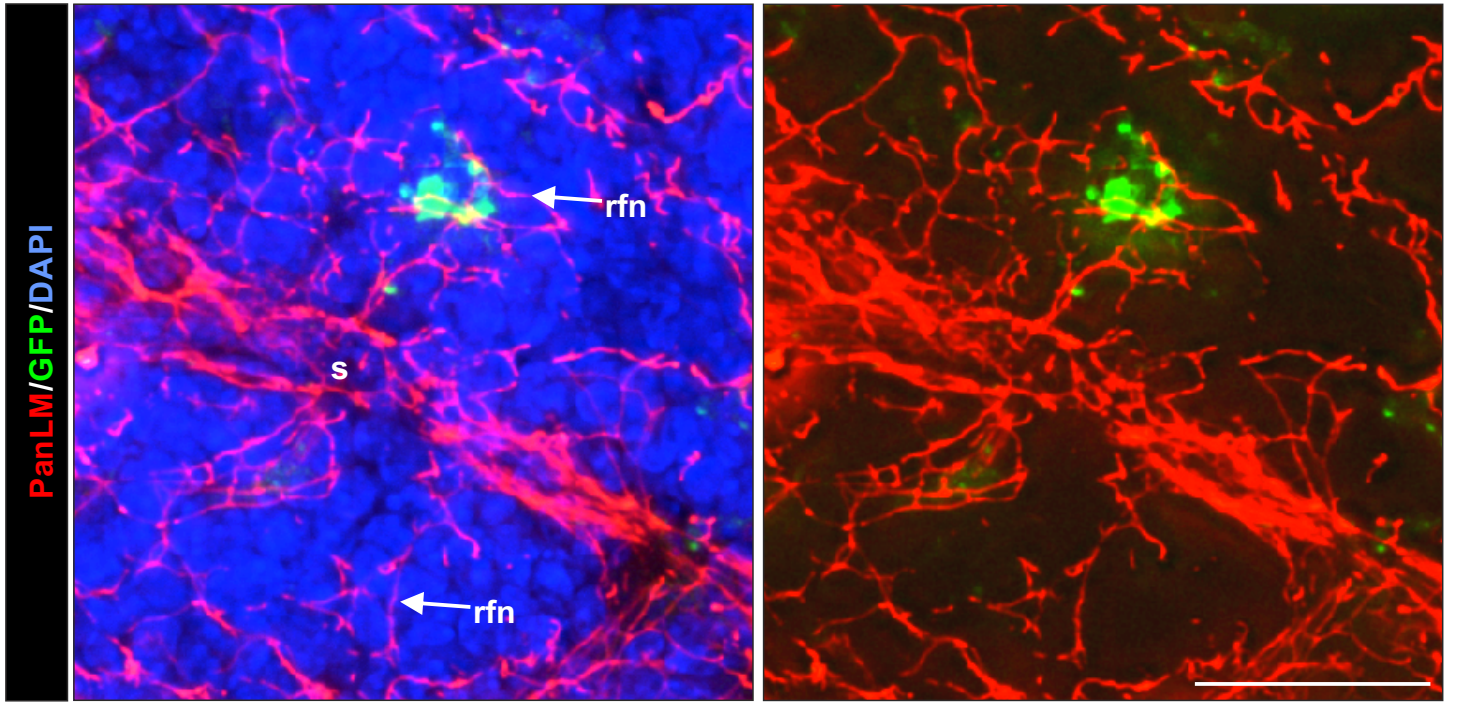

Supplement: NIHMS1692048-supplement-Supple_figure_S2.pdf [file NIHMS1692048-supplement-Supple_figure_S2.pdf]

*Lama4*<sup>-/-</sup>

A

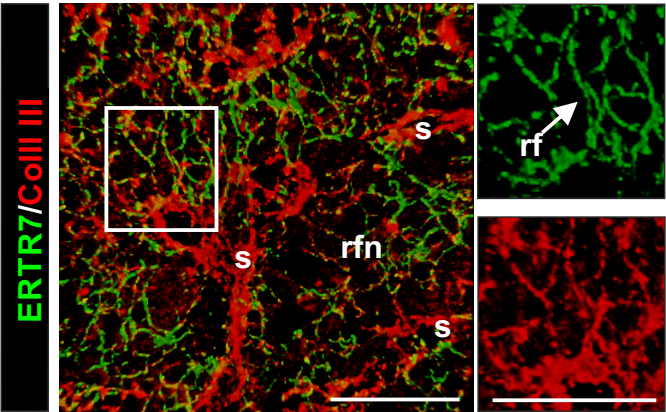

B

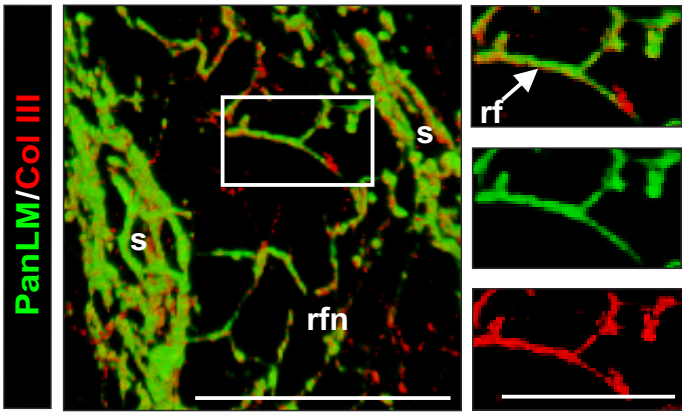

Supplement: NIHMS1692048-supplement-Supple_figure_S3.pdf [file NIHMS1692048-supplement-Supple_figure_S3.pdf]

Reconstitution of CD45.I WT mice with bone marrow  
from adult WT or LMa4 KO mice

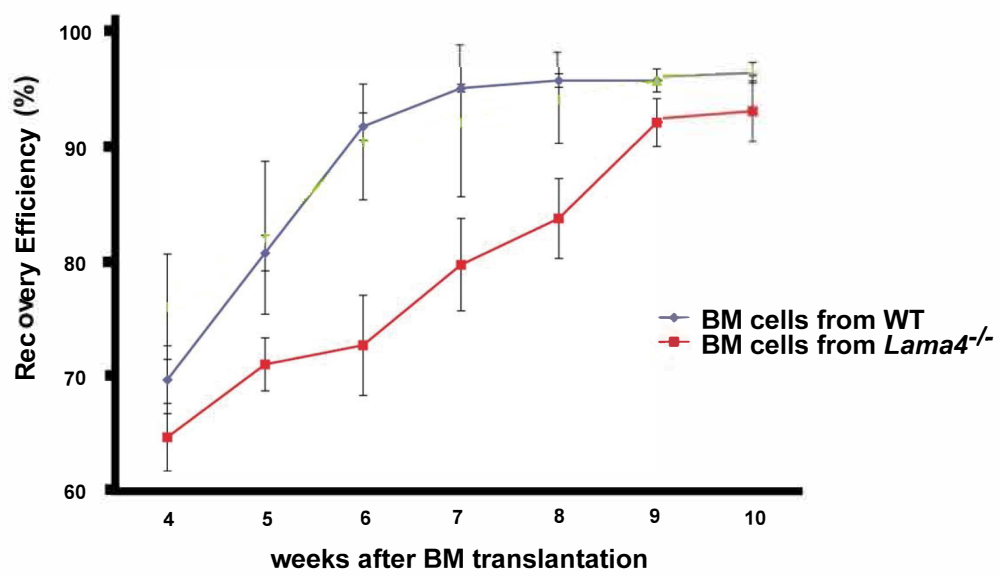

Supplement: NIHMS1692048-supplement-Supple_figure_S4.pdf [file NIHMS1692048-supplement-Supple_figure_S4.pdf]

Supplemental figure S5

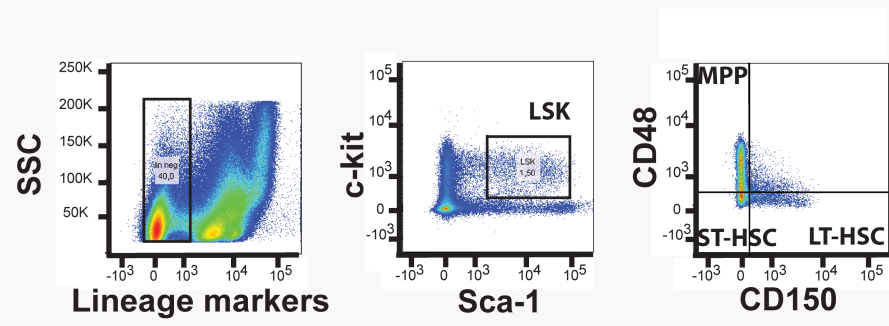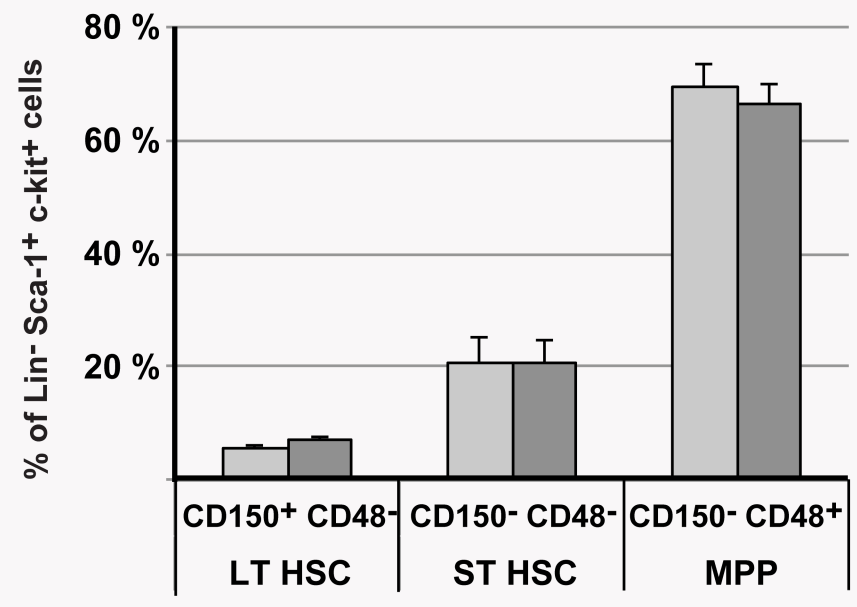

Supplement: NIHMS1692048-supplement-Supple_figure_S5.pdf [file NIHMS1692048-supplement-Supple_figure_S5.pdf]

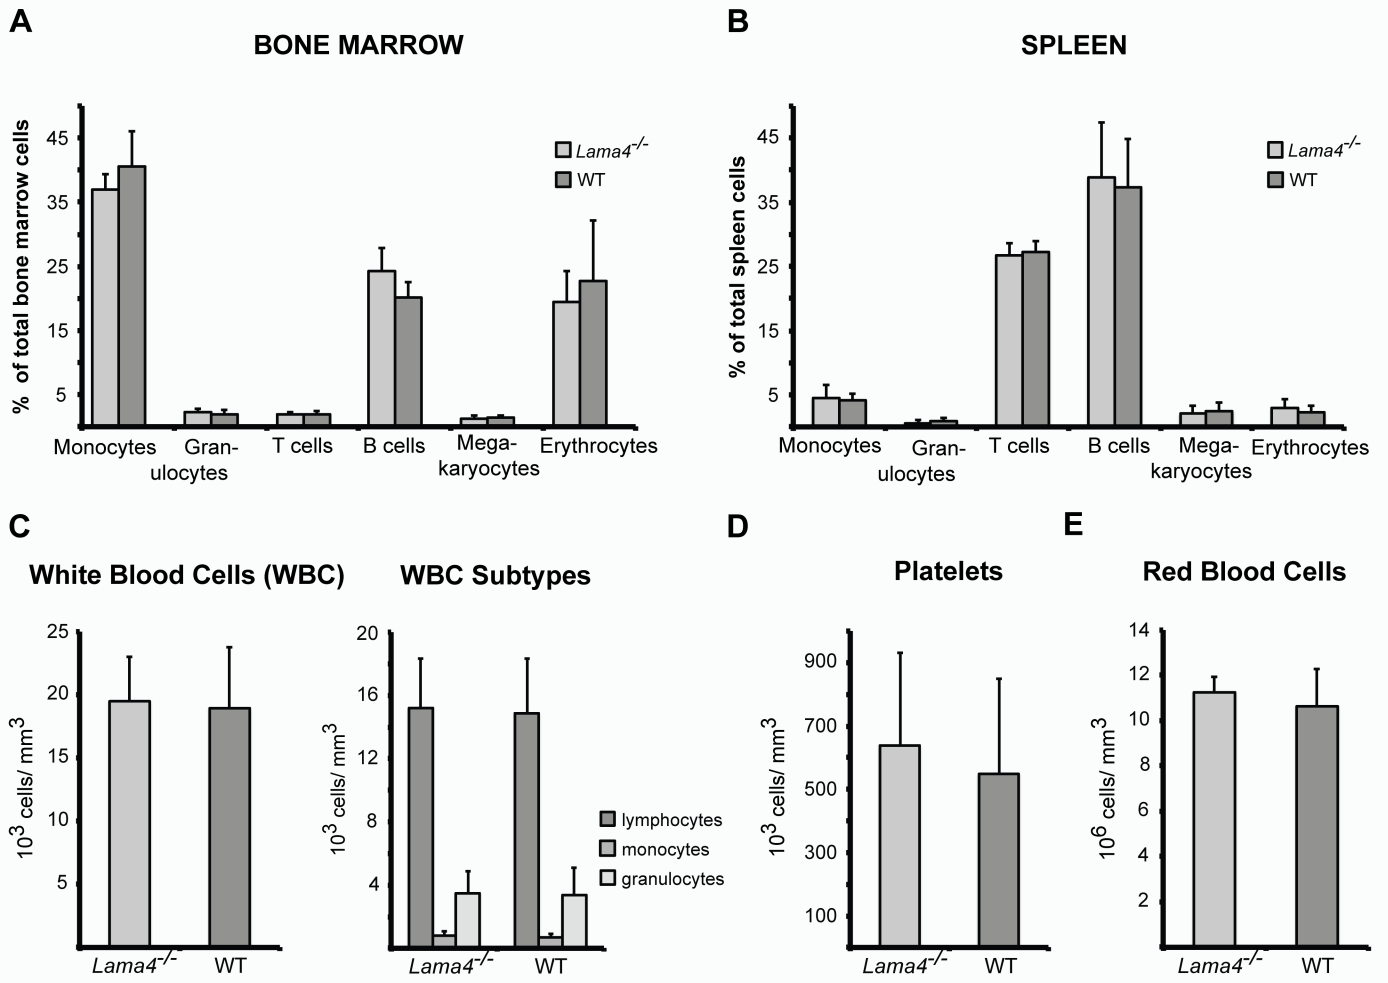

Supplement: NIHMS1692048-supplement-Supple_figure_S6.pdf [file NIHMS1692048-supplement-Supple_figure_S6.pdf]

Supplemental figure S7

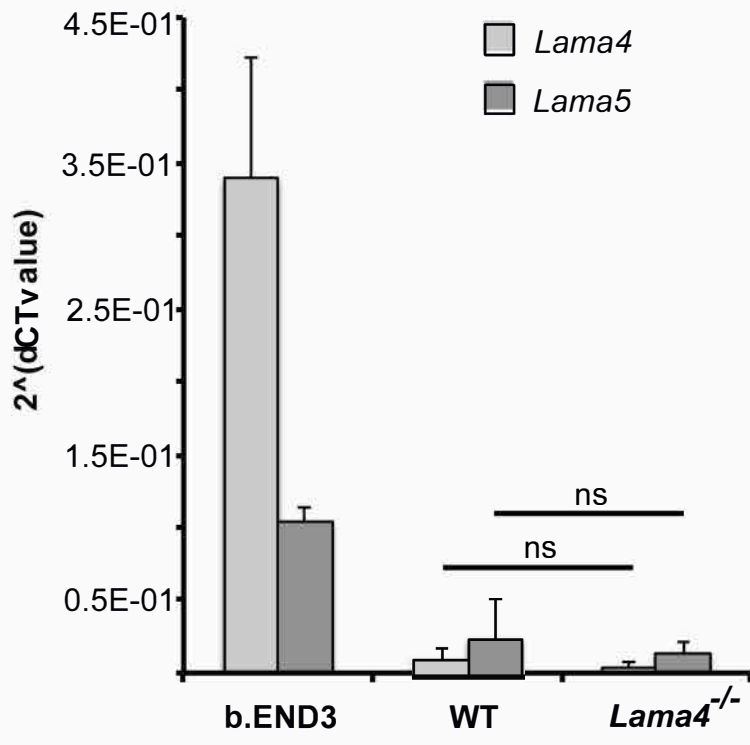

Supplement: NIHMS1692048-supplement-Supple_figure_S7.pdf [file NIHMS1692048-supplement-Supple_figure_S7.pdf]
